# Supplementary material for: JAC4 Alleviates Rotenone-Induced Parkinson’s Disease through the Inactivation of the NLRP3 Signal Pathway
Source: MDPI journal article supplement (doi:10.3390/antiox12051134), 2023-05-20
Supplement: s1 [file s1]

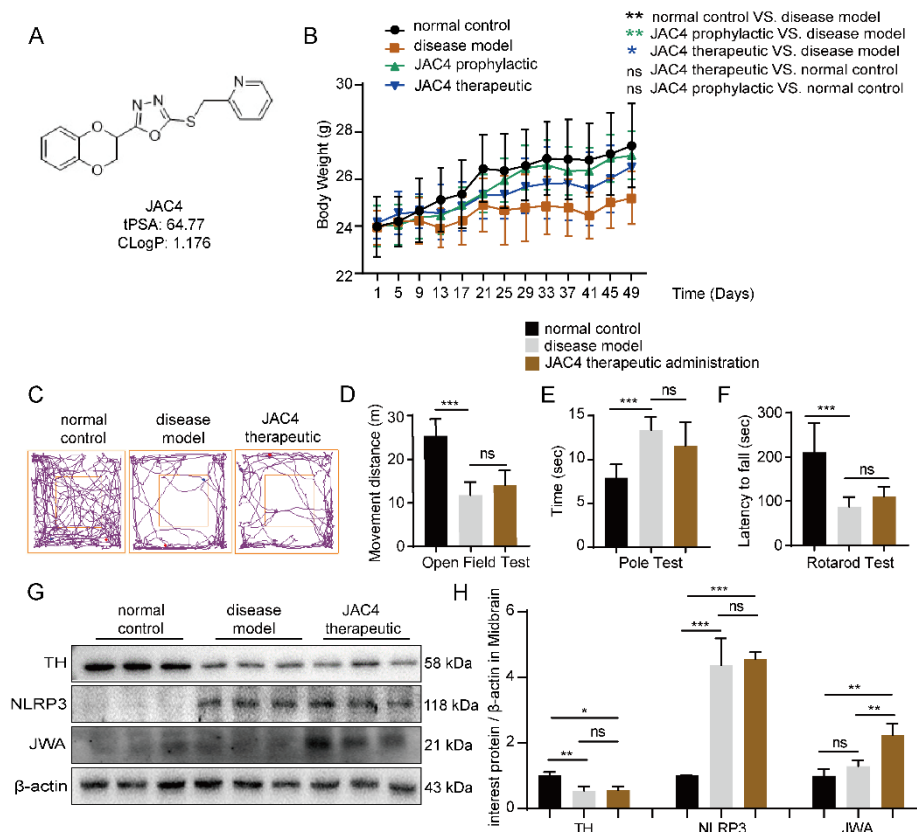

**Figure S1:** Effect of JAC4 therapeutic intervention in Rot-induced PD mice. **(A)** The chemical structural formula. **(B)** The body weight curves of Rot-exposure mouse model ( $n = 10$ ). **(C–F)** Behavioral test results about normal control, disease model and JAC4 therapeutic intervention mice. Movement track **(C)** and distance **(D)** of mice during 5 min in the open field. Climbing time from the top of pole to the bottom in the pole test **(E)**. Latency to fall within 5 min in the rotarod test **(F)**. **(G, H)** The protein expression levels of TH, JWA and NLRP3 in midbrain and their quantitative results. The results are shown as the mean  $\pm$  SEM (\*  $p < 0.05$ , \*\*  $p < 0.01$ , \*\*\*  $p < 0.001$ , ns  $p > 0.05$ ).

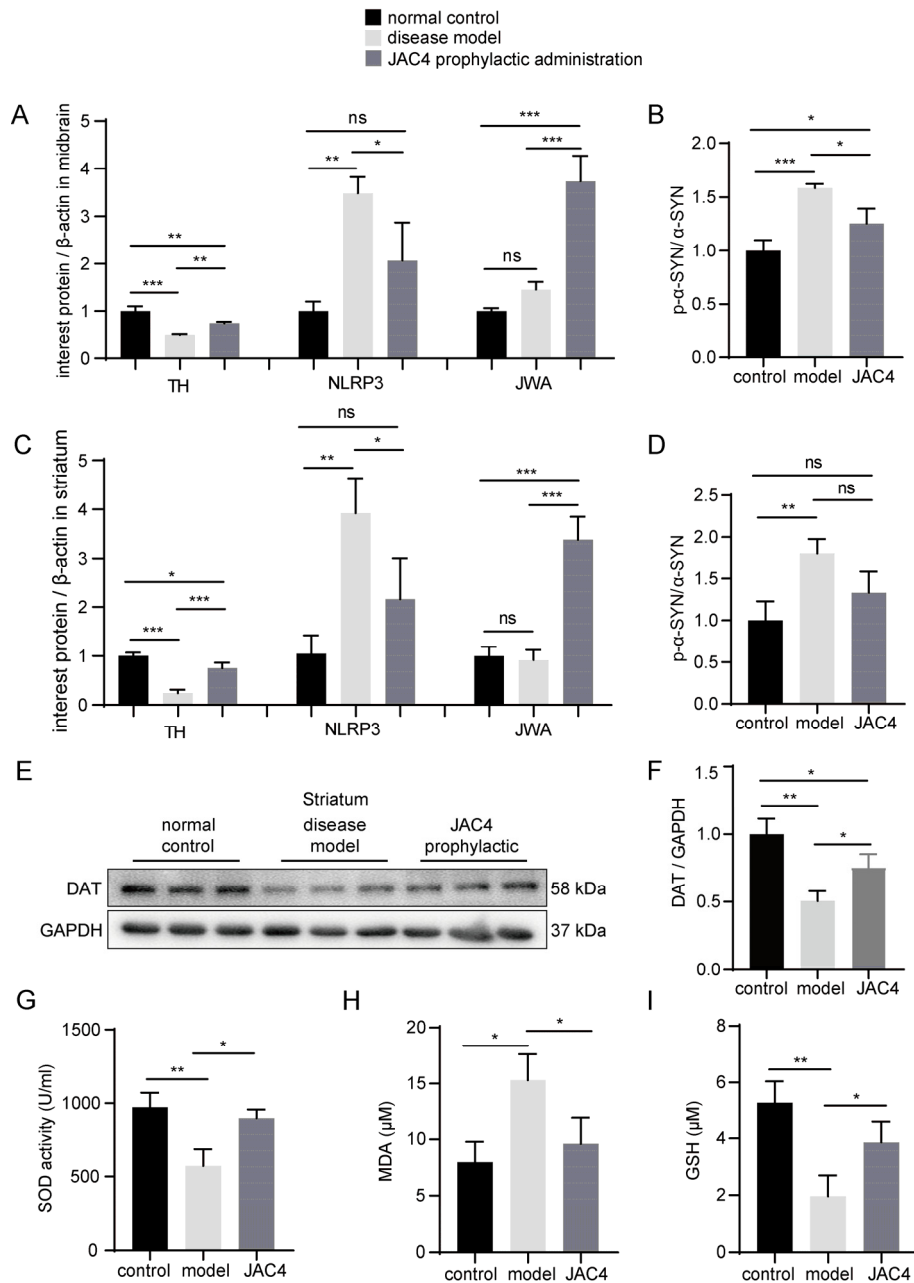

**Figure S2:** (A, C) The quantitative results of TH, NLRP3, and JWA protein levels in the midbrain (A) and striatum (C). (B, D) The quantitative results of p- $\alpha$  synuclein (Ser129)/  $\alpha$  synuclein ratio in the midbrain (B) and striatum (D). (E-F) The protein expression levels of dopamine transporter (DAT) in striatum. (G-I) The content of SOD, MDA and GSH in serum. The results are shown as the mean  $\pm$  SEM ( $n = 3$ , \*  $p < 0.05$ , \*\*  $p < 0.01$ , \*\*\*  $p < 0.001$ , ns  $p > 0.05$ ).
